# Supplementary material for: Exploring the Potential of Overexpressed OsCIPK2 Rice as a Nitrogen Utilization Efficient Crop and Analysis of Its Associated Rhizo-Compartmental Microbial Communities
Source: Int J Mol Sci. 2019 Jul 25;20(15):3636. doi: 10.3390/ijms20153636 (PMC6695771; doi:10.3390/ijms20153636)
Supplement: Supplementary file 1 [file ijms-20-03636-s001.pdf]

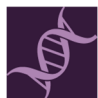

## Supplementary Materials

# Exploring the Potential of Overexpressed *OsCIPK2* Rice as a Nitrogen Utilization Efficient Crop and Analysis of Its Associated Rhizo-Compartmental Microbial Communities

Muhammad Umar Khan <sup>1,2,†,\*</sup>, Penghui Li <sup>2,3,†</sup>, Hira Amjad <sup>1,2</sup>, Ali Qaiser Khan <sup>4</sup>, Yasir Arafat <sup>1,2</sup>, Muhammad Waqas <sup>2,3</sup>, Zhong Li <sup>1,3</sup>, Ali Noman <sup>5</sup>, Waqar Islam <sup>6</sup>, Linkun Wu <sup>1</sup>, Zhixing Zhang <sup>1</sup> and Wenxiong Lin <sup>1,2,3,\*</sup>

<sup>1</sup> Fujian Provincial Key Laboratory of Agroecological Processing and Safety Monitoring, College of Life Sciences, Fujian Agriculture and Forestry University, Fuzhou 350002, China

<sup>2</sup> Key Laboratory of Crop Ecology and Molecular Physiology, Fujian Agriculture and Forestry University, Fuzhou 350002, China

<sup>3</sup> Key Laboratory for Genetics, Breeding and Multiple Utilization of Crops, Ministry of Education/College of Crop Sciences, Fujian Agriculture and Forestry University, Fuzhou 350002, China

<sup>4</sup> College of Agriculture, Nanjing Agricultural University, Nanjing 210095, China

<sup>5</sup> Department of Botany, Government College University, Faisalabad 38000, Pakistan

<sup>6</sup> College of Geographical Sciences, Fujian Normal University, Fuzhou 350007, China

\* Correspondence: umar.khan018@yahoo.com (M.U.K.); lwx@fafu.edu.cn (W.L.); Tel.: +86-591-83737535, (W.L.)

† These authors contributed equally to this work

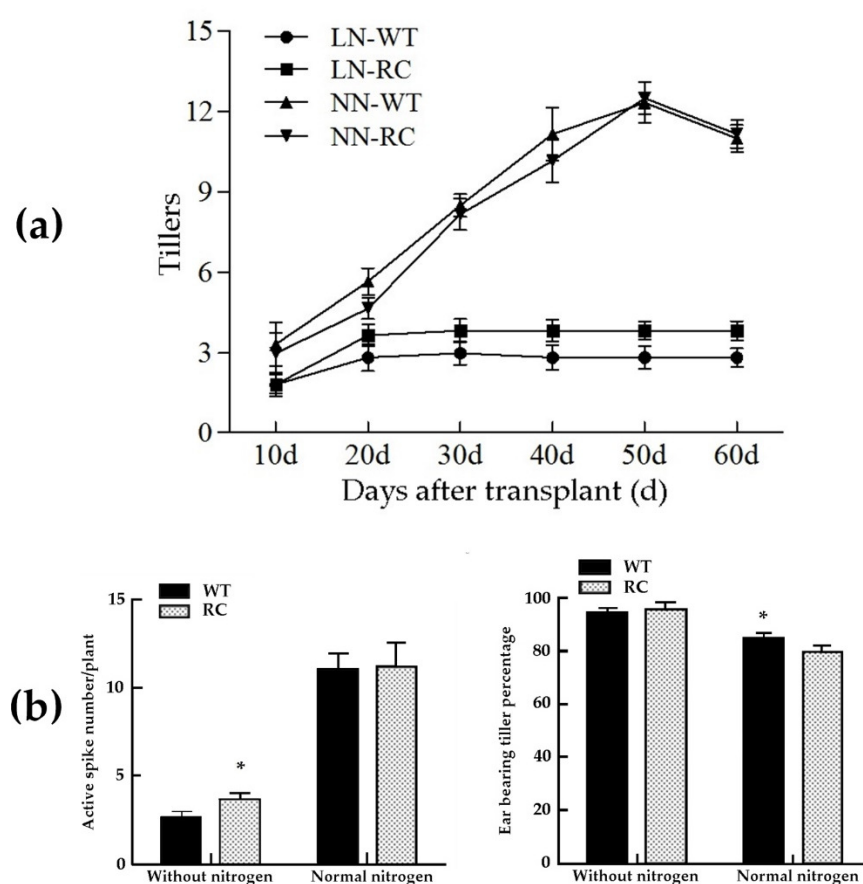

**Figure S1.** (a) Tillering dynamics of rice under different nitrogen treatments in pots. LN -WT: No N Wild type, LN-RC: Zero N Transgenic rice, NN-WT: Normal Nitrogen Wild type and NN-RC: Normal Nitrogen Transgenic rice. (b) Effective spike number and ear bearing tiller percentage of rice under different nitrogen treatments in pots. LN: no nitrogen treatment, NN: normal nitrogen treatment. \*indicate significant difference at ( $p < 0.05$ ) between different samples in the same treatment calculated by LSD's test.

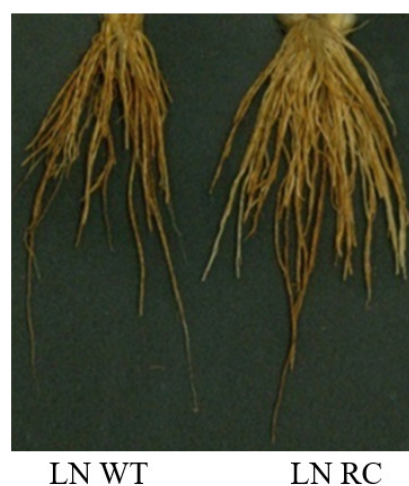

**Figure S2.** Rice roots at heading stage under no nitrogen treatment in bucket.

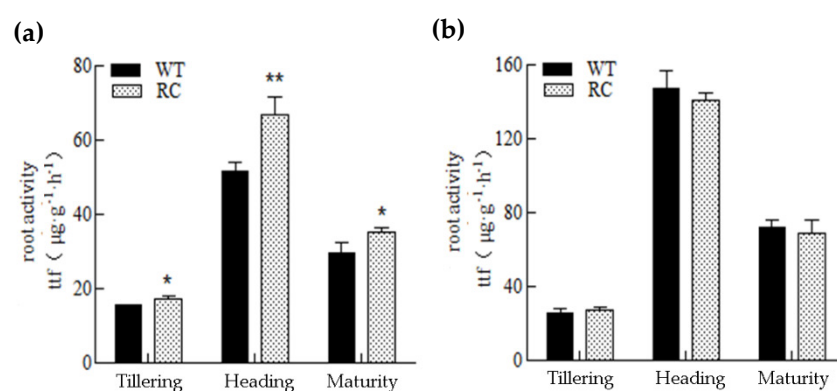

**Figure S3.** Root activity of rice at different growth stages under different nitrogen treatments in pots **a:** LN, no nitrogen treatment, **b:** NN, normal nitrogen treatment. \*, \*\* indicates significant difference ( $p < 0.05$ ) between different samples in the same growth period calculated by LSD's test.

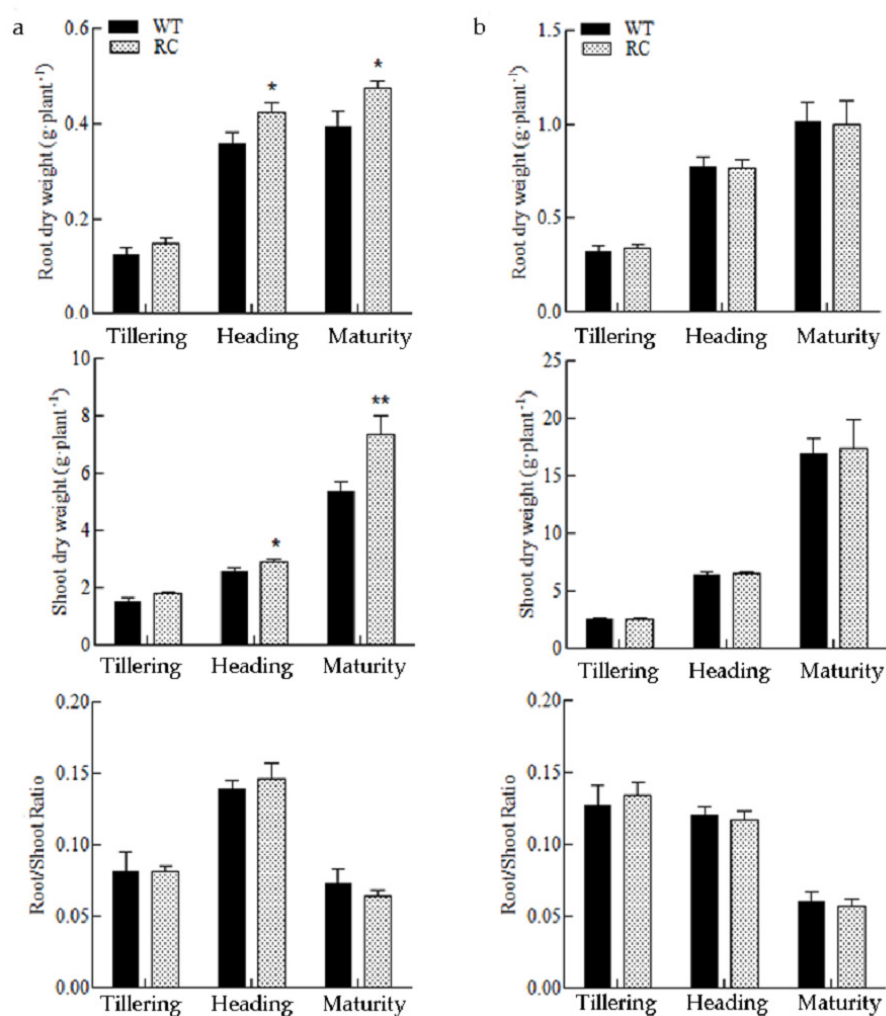

**Figure S4.** Dry weight and root-shoot ratio of rice at different growth stages. (a) no nitrogen treatment, (b) normal nitrogen treatment. \*, \*\* indicates significant difference ( $p < 0.05$ ) between different samples in the same growth period calculated by LSD's test.

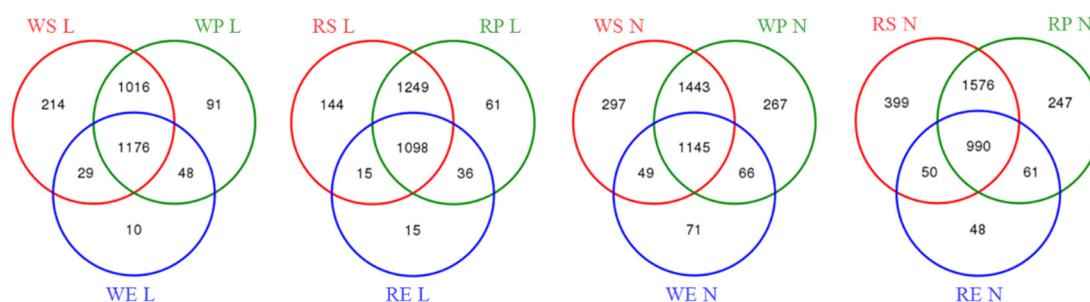

**Figure S5.** Venn diagram of OTUs in rice rhizo-compartments. WSL, WPL, WE L represents Wild type rhizosphere, wild type rhizoplane, wild endosphere under no nitrogen, respectively. RS L, RP L, RE L represents transgenic line rhizosphere, transgenic line rhizoplane, transgenic line endosphere under no nitrogen. WS N, WP N, WE N represents Wild type rhizosphere, wild type rhizoplane, wild endosphere under normal nitrogen, respectively. RS N, RP N, RE N represents transgenic line rhizosphere, transgenic line rhizoplane, transgenic line endosphere under normal nitrogen, respectively.

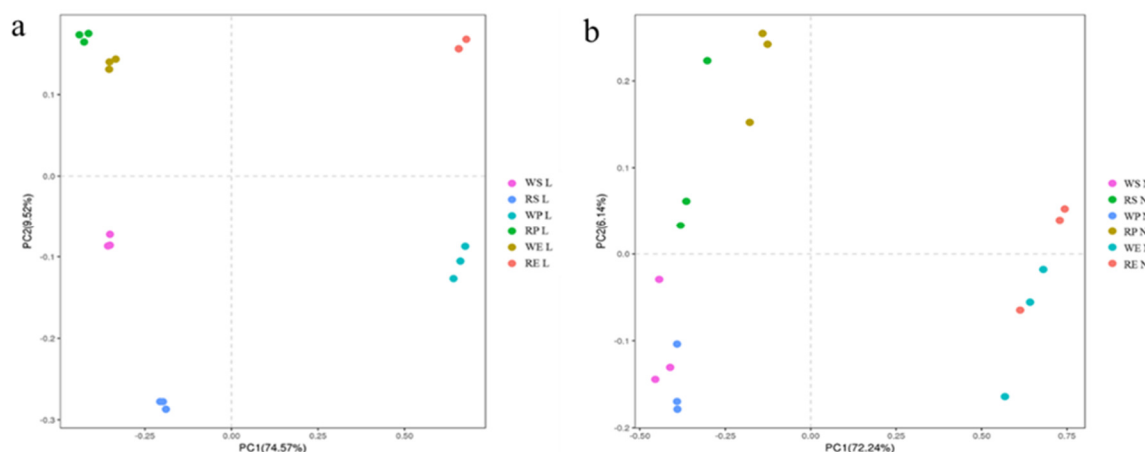

**Figure S6.** The results of principal component analysis of bacterial communities in rhizo-compartments of rice. WS L, WPL, WE L represents Wild type rhizosphere, wild type rhizoplane, wild endosphere under no nitrogen, respectively. RS L, RP L, RE L represents transgenic line rhizosphere, transgenic line rhizoplane, transgenic line endosphere under no nitrogen. WS N, WP N, WE N represents Wild type rhizosphere, wild type rhizoplane, wild endosphere under normal nitrogen, respectively. RS N, RP N, RE N represents transgenic line rhizosphere, transgenic line rhizoplane, transgenic line endosphere under normal nitrogen, respectively.

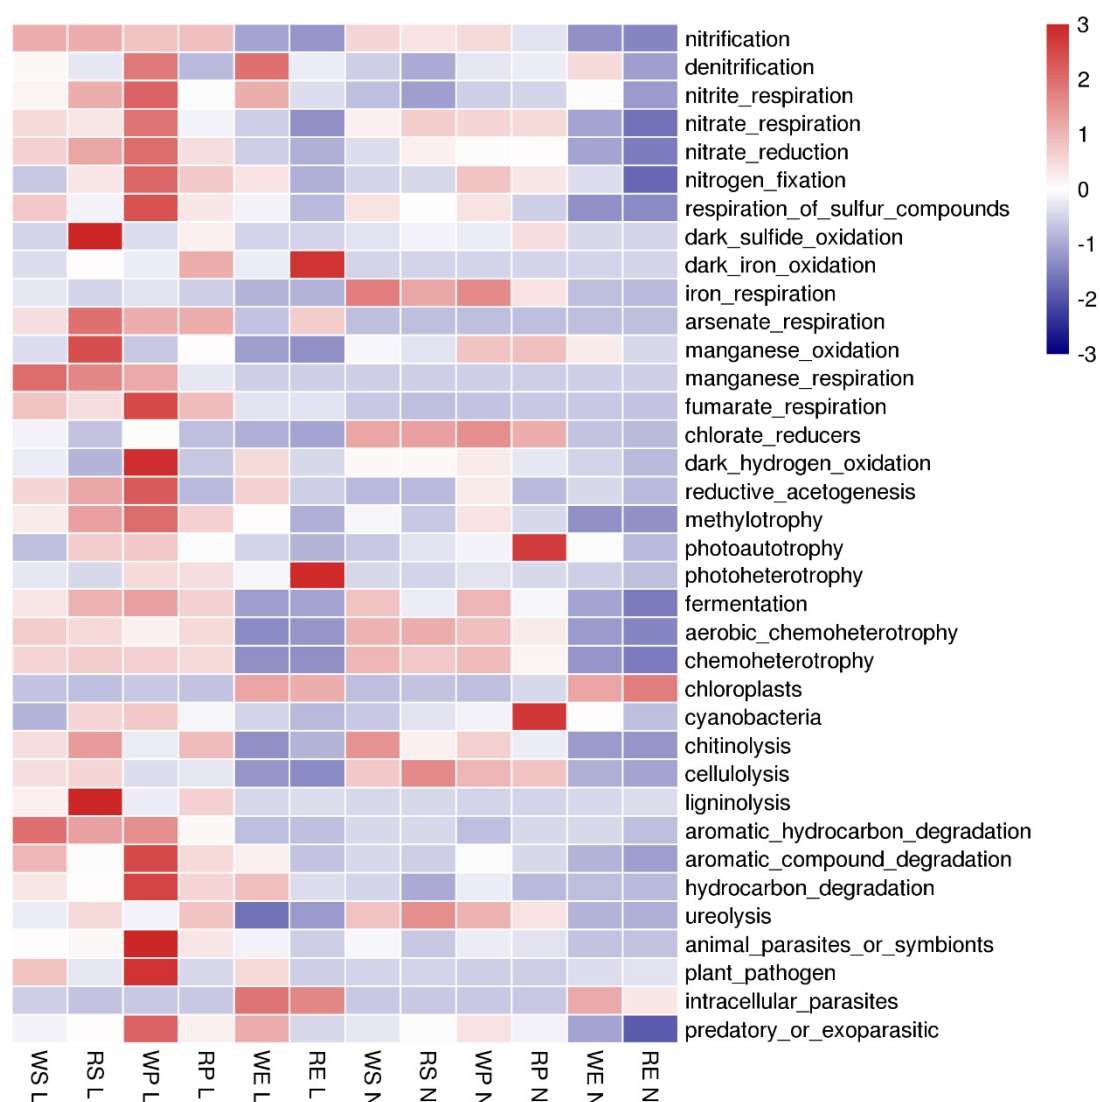

**Figure S7.** Heat map of OTUs abundance of different functional bacteria in rhizo-compartments of rice under different nitrogen treatments. The heat map shows the Z-score of relative abundance of each functional bacteria, the relative values for bacteria of different function are indicated by color intensity.

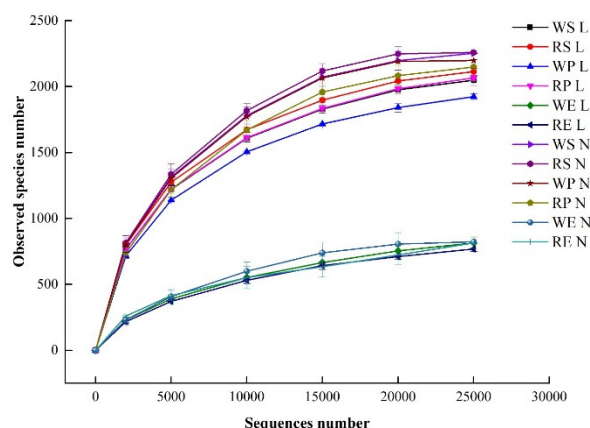

**Figure S8.** Rarefaction curves of rhizosphere, rhizoplane, endosphere samples of rice. WS, WE, WS respectively represent rhizosphere, rhizoplane, endosphere of WT; RS, RP, RE refers to rhizosphere, rhizoplane, endosphere of root specific expression CIPK2 rice (RC), L represents no nitrogen treatment, N represents normal nitrogen treatment, the same as below.

**Table S1.** Primers and Conditions *OsCIPK2* and *actin* gene.

|                                                                                                                                                                                                                      |                            |
|----------------------------------------------------------------------------------------------------------------------------------------------------------------------------------------------------------------------|----------------------------|
| <b>The primer sequence is as follows</b>                                                                                                                                                                             |                            |
| Actin Forward primer                                                                                                                                                                                                 | 5'GGAAGTGGTATGGTCAAGGC 3'  |
| Actin Reverse primer                                                                                                                                                                                                 | 3'AGTCTCATGGATAACCGCAG 3'  |
| OsCIPK2 Forward primer                                                                                                                                                                                               | 5' GCCCGTAACACCGAGACTT 3'  |
| OsCIPK2 Reverse primer                                                                                                                                                                                               | 5' GCCTCACCAACTTCATCACA 3' |
| <b>The reaction system is as follows</b>                                                                                                                                                                             |                            |
| 2× qPCR mastermix                                                                                                                                                                                                    | 7.5μL                      |
| Forward primer                                                                                                                                                                                                       | 0.5μL                      |
| Reverse primer                                                                                                                                                                                                       | 0.5μL                      |
| cDNA                                                                                                                                                                                                                 | 0.5μL                      |
| Rnasefree water to make up the total system of 15μL                                                                                                                                                                  |                            |
| <i>Actin</i> gene PCR amplification reaction profile: 95°C 5min;                                                                                                                                                     |                            |
| 95°C 15s                                                                                                                                                                                                             | } 35 cycles                |
| 55°C 20s                                                                                                                                                                                                             |                            |
| 72°C 30s                                                                                                                                                                                                             |                            |
| <i>OsCIPK2</i> gene PCR amplification reaction profile: 95°C 5min;                                                                                                                                                   |                            |
| 95°C 15s                                                                                                                                                                                                             | } 35 cycles                |
| 55°C 20s                                                                                                                                                                                                             |                            |
| 72°C 30s                                                                                                                                                                                                             |                            |
| Melting curve analysis refers to the standard set value of Bio-rad CFX Connect (Bio-rad) of PCR instrument. The expression of CIPK2 gene among different rice genotypes was calculated by 2 <sup>-ΔΔct</sup> method. |                            |

**Table S2.** Morphological characteristics of roots under different nitrogen treatments in pots.

| Stage    | Treatment | Genotype | Adventitious root length(m) | Fine lateral root length(m) | Coarse lateral root length(m) | Total Rhizoplane area(cm <sup>2</sup> ) | Total root volume (cm <sup>3</sup> ) |
|----------|-----------|----------|-----------------------------|-----------------------------|-------------------------------|-----------------------------------------|--------------------------------------|
| Heading  | LN        | WT       | 6.29c                       | 1.08c                       | 0.90c                         | 159.50c                                 | 2.627c                               |
|          |           | RC       | 9.05b                       | 2.28b                       | 1.98b                         | 231.18b                                 | 2.964b                               |
|          | NN        | WT       | 17.64a                      | 4.10a                       | 3.12a                         | 452.02a                                 | 6.007a                               |
|          |           | RC       | 17.83a                      | 4.19a                       | 3.03a                         | 445.67a                                 | 5.750a                               |
| Maturity | LN        | WT       | 4.85c                       | 2.04c                       | 0.93b                         | 101.10b                                 | 1.012b                               |
|          |           | RC       | 5.91b                       | 2.75b                       | 1.48b                         | 124.58b                                 | 1.181b                               |
|          | NN        | WT       | 14.72a                      | 6.65a                       | 3.37a                         | 356.10a                                 | 4.244a                               |
|          |           | RC       | 14.61a                      | 7.18a                       | 3.49a                         | 350.09a                                 | 4.068a                               |

**Table S3.** Rice plant nitrogen and nitrogen utilization ratio.

|                                                                                                                                                                              |
|------------------------------------------------------------------------------------------------------------------------------------------------------------------------------|
| Biomass nitrogen use efficiency (BNUE) = dry matter accumulation/total nitrogen uptake per plant                                                                             |
| Nitrogen grain utilization efficiency (NGUE) = grain yield/total nitrogen uptake per plant                                                                                   |
| Nitrogen harvest index (NHI) = grain nitrogen accumulation/total plant nitrogen uptake                                                                                       |
| Nitrogen Physiological Efficiency (PE) = (Grain Yield in Nitrogen-Free Zone) / (Total Nitrogen Uptake in Nitrogen-Free Zone) / (Total Nitrogen Uptake in Nitrogen-Free Zone) |
| Nitrogen agronomic efficiency (AE) = (grain yield in nitrogen-free area) / nitrogen application rate                                                                         |
| Nitrogen recovery efficiency (RE) = (total nitrogen uptake by plants in nitrogen-free zone) / nitrogen application *100                                                      |

**Table S4.** Nitrogen cycle related gene primer sequences and amplification conditions.

| Gene                  | Primer Sequences (5'–3')     | conditions                                                       |
|-----------------------|------------------------------|------------------------------------------------------------------|
| <i>nifH</i> [1]       | nifH-F: CCTACGGGAGGCAGCAG    | 95°C 5min;                                                       |
|                       | nifH-R: ATTACCGCGGCTGCTGGCA  | 95°C 45s, 59°C 45s, 72°C 45s; 39 cycles                          |
| <i>amoA</i> (AOB) [2] | AOB-F: GGGGTTTCTACTGGTGGT    | 95°C 15min;                                                      |
|                       | AOB-R: CCCCTCKGSAAAGCCTTCTTC | 94°C 45s, 58°C 45s, 72°C 45s; 39 cycles                          |
| <i>amoA</i> (AOA) [3] | AOA-F: ATGGTCTGGCTWAGACG     | 95°C 10min;                                                      |
|                       | AOA-R: GCCATCCABCKRTANGTCCA  | 94°C 45s, 55°C 45s, 72°C 45s; 39 cycles                          |
| <i>nosZ</i> [4,5]     | noSZ-F: CGCRACGGCAASAAGGTSMS | 95°C 15min;                                                      |
|                       | nosZ-R:                      | 95°C 15s, 65–60°C 30s, 72°C 30s, 80°C                            |
|                       | SGTCAKRTGCAKSGCARTGGCAGAA    | 15s, 6 cycles; 95°C 15s, 64°C 30s, 72°C 30s, 80°C 15s; 40 cycles |

|                 |                                         |                                                                  |
|-----------------|-----------------------------------------|------------------------------------------------------------------|
|                 |                                         | 95°C 15min;                                                      |
| <i>nirS</i> [5] | <i>nirS</i> -F: AACGYSAAGGARACSGG       | 95°C 15s, 65-60°C 30s, 72°C 30s, 80°C                            |
|                 | <i>nirS</i> -R: GASTTCGGRTGSGTCTTSAYGAA | 15s, 6 cycles; 95°C 15s, 63°C 30s, 72°C 30s, 80°C 15s; 40 cycles |
|                 |                                         | 95°C,15min;                                                      |
| <i>narG</i> [6] | <i>narG</i> -F: TAYGTSGGGCAGGARAACTG    | 95°C 15s,65-60°C 30s, 72°C 30s, 80°C                             |
|                 | <i>narG</i> -R: CGTAGAAGAAGCTGGTGCTGTT  | 15s, 6 cycles; 95°C 15s, 60°C 30s, 72°C 30s, 80°C 15s; 40 cycles |
|                 |                                         | 95°C 15min;                                                      |
| <i>nirK</i> [7] | <i>nirK</i> -F: ATYGGCGGVCA YGGCGA      | 95°C 15s, 63-58°C 30s, 72°C 30s, 80°C                            |
|                 | <i>nirK</i> -R: GCCTCGATCAGRTTTRTGTT    | 15s; 6 cycles; 95°C 15s, 60°C 30s, 72°C 30s, 80°C 15s, 40 cycles |

1. Van Kessel, C.; Hartley, C., Agricultural management of grain legumes: has it led to an increase in nitrogen fixation? *Field Crops Research* **2000**, 65, (2-3), 165-181.
2. Jensen, E. S.; Hauggaard-Nielsen, H.; Kinane, J.; Andersen, M. K.; Jørnsgaard, B. In *Intercropping—The practical application of diversity, competition, and facilitation in arable and organic cropping systems*, Researching Sustainable Systems 2005. Proceedings of the First Scientific Conference of the International Society of Organic Agricultural Research (ISO FAR). 2005; ISO FAR, Bonn, Germany: 2005; pp 22-25.
3. Zhang, X.-q.; Huang, G.-q.; Bian, X.-m.; Jiang, X.-h.; Zhao, Q., Review of researches on advantages of intercropping. *Asian Agricultural Research* **2012**, 4, (1812-2016-143519), 126.
4. Poggio, S. L., Structure of weed communities occurring in monoculture and intercropping of field pea and barley. *Agriculture Ecosystems & Environment* **2005**, 109, (1), 48-58.
5. Poggio, S. L., Structure of weed communities occurring in monoculture and intercropping of field pea and barley. *Agriculture, ecosystems & environment* **2005**, 109, (1-2), 48-58.
6. Li, L.; Zhang, F.; Li, X.; Christie, P.; Sun, J.; Yang, S.; Tang, C., Interspecific facilitation of nutrient uptake by intercropped maize and faba bean. *Nutrient Cycling in Agroecosystems* **2003**, 65, (1), 61-71.
7. Latif, M.; Mehuys, G.; Mackenzie, A.; Alli, I.; Faris, M., Effects of legumes on soil physical quality in a maize crop. *Plant and Soil* **1992**, 140, (1), 15-23.
